# Supplementary material for: Coordination polymer gel derived from a tetrazole ligand and Zn2+: spectroscopic and mechanical properties of an amorphous coordination polymer gel
Source: Royal Society of Chemistry journal article supplement (doi:10.1039/c2sm07231a), 2012-01-01
Supplement: c2sm07231a.pdf [file c2sm07231a.pdf]

**【Electronic Supplementary Information】**

Coordination polymer gel derived from a tetrazole  
ligand and  $\text{Zn}^{2+}$ : spectroscopic and mechanical  
properties of an amorphous coordination polymer gel

*Hyejin Lee,<sup>†</sup> Sunwoo Kang,<sup>‡</sup> Jin Yong Lee<sup>\*,‡</sup> and Jong Hwa Jung<sup>\*,†</sup>*

<sup>†</sup>Department of Chemistry and Research Institute of Natural Sciences Gyeongsang National  
University, Jinju 660-701, Korea

<sup>‡</sup>Department of Chemistry and Institute of Basic Science Sungkyunkwan University, Suwon  
440-746, Korea

E-mail: jinylee@skku.edu; jonghwa@gnu.ac.kr

**Table S1** Gelation test of ligand **2** (3.0 wt%) with metal ions (2.0 equivalents) in organic solvents.

| Entry | Solvent              | Zn(ClO <sub>4</sub> ) <sub>2</sub> | Cu(ClO <sub>4</sub> ) <sub>2</sub> | Co(ClO <sub>4</sub> ) <sub>2</sub> |
|-------|----------------------|------------------------------------|------------------------------------|------------------------------------|
| 1     | MeOH                 | P                                  | P                                  | P                                  |
| 2     | DMF                  | P                                  | P                                  | P                                  |
| 3     | DMSO                 | P                                  | P                                  | P                                  |
| 4     | DCM                  | P                                  | P                                  | P                                  |
| 5     | THF                  | P                                  | P                                  | P                                  |
| 6     | Toluene              | P                                  | P                                  | P                                  |
| 7     | ACN                  | P                                  | P                                  | P                                  |
| 8     | DMA                  | P                                  | P                                  | P                                  |
| 9     | EA                   | P                                  | P                                  | P                                  |
| 10    | CHCl <sub>3</sub>    | P                                  | P                                  | P                                  |
| 11    | Dioxane              | P                                  | P                                  | P                                  |
| 12    | H <sub>2</sub> O     | P                                  | P                                  | P                                  |
| 13    | Acetone              | P                                  | P                                  | P                                  |
| 14    | DMF:MeOH             | P                                  | P                                  | P                                  |
| 15    | DMF:H <sub>2</sub> O | P                                  | P                                  | P                                  |

P: precipitate

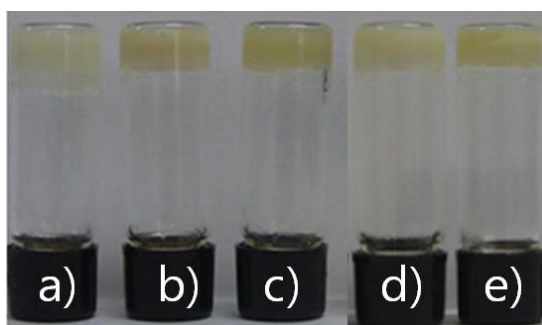

**Fig. S1** Photographs of the coordination polymer gels **1** with (a)  $\text{Zn}(\text{ClO}_4)_2$ , (b)  $\text{Zn}(\text{OAc})_2$ , (c)  $\text{ZnCl}_2$ , (d)  $\text{ZnBr}_2$ , and (e)  $\text{ZnI}_2$  in  $\text{DMF}/\text{MeOH}(1/1, v/v)$ .

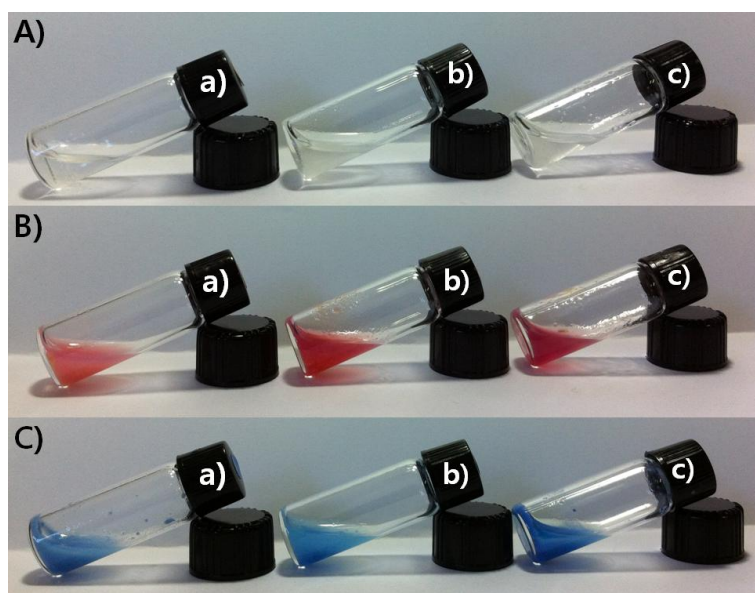

**Fig. S2** Photographs of **2** with (A)  $\text{Zn}(\text{ClO}_4)_2$ , (B)  $\text{Co}(\text{ClO}_4)_2$ , (C)  $\text{Cu}(\text{ClO}_4)_2$  in (a) DMF/MeOH(1/1, v/v), (b) DMF and (c) DMA.

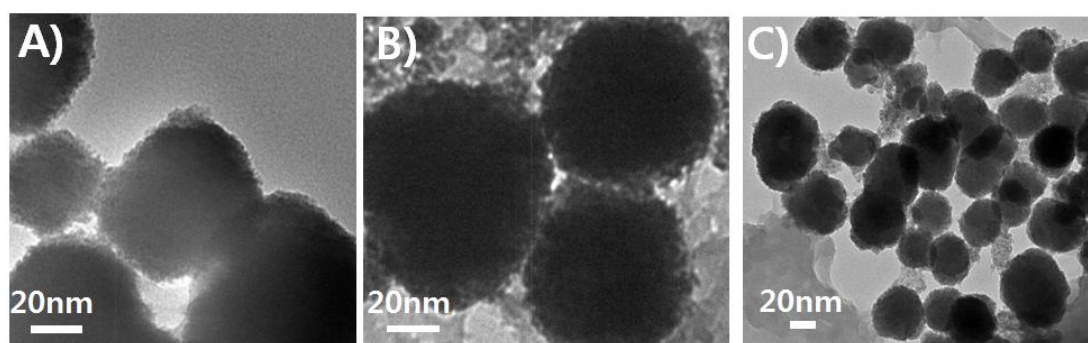

**Fig. S3** TEM images of  $\text{Zn}^{2+}$  coordination polymer gels **1** with different anions such as (A)  $\text{ClO}_4^-$ , (B)  $\text{I}^-$ , and (C)  $\text{Cl}^-$ .

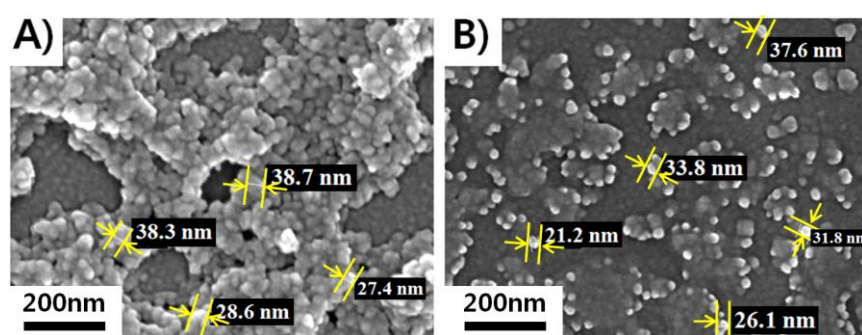

**Fig. S4** SEM images of the coordination polymer gels **1** (20 mM) with (a)  $\text{Co}(\text{ClO}_4)_2$ , (b)  $\text{Cu}(\text{ClO}_4)_2$  (2.0 equiv) in DMF/MeOH(1/1, v/v).

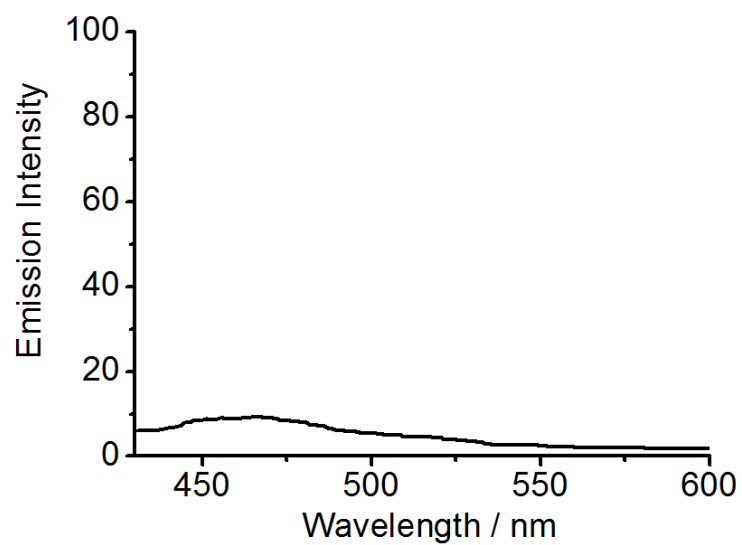

**Fig. S5** Fluorescence spectrum of ligand **1** (60 mM) in the absence of metal ions in DMF:MeOH.

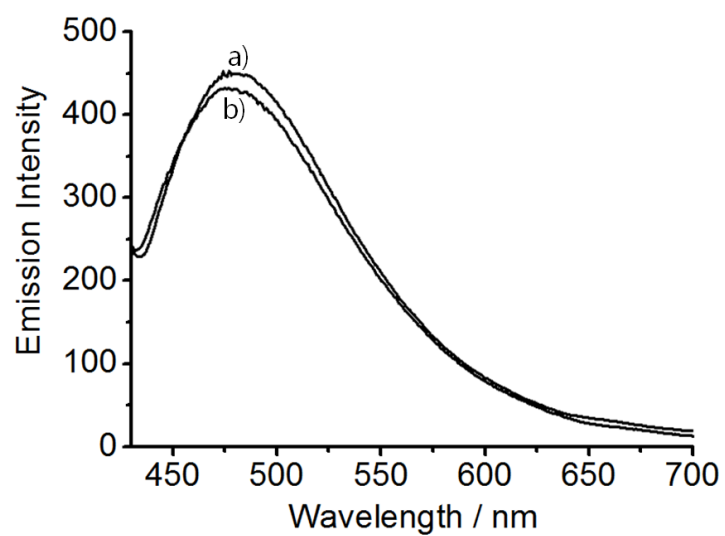

**Fig. S6** Fluorescence spectra (excitation at  $\lambda=320$  nm for sol **1** and 410 nm for gel **1** (20 mM) with  $\text{Zn}(\text{ClO}_4)_2$  (2.0 equiv) in (a) DMA and (b) DMF.



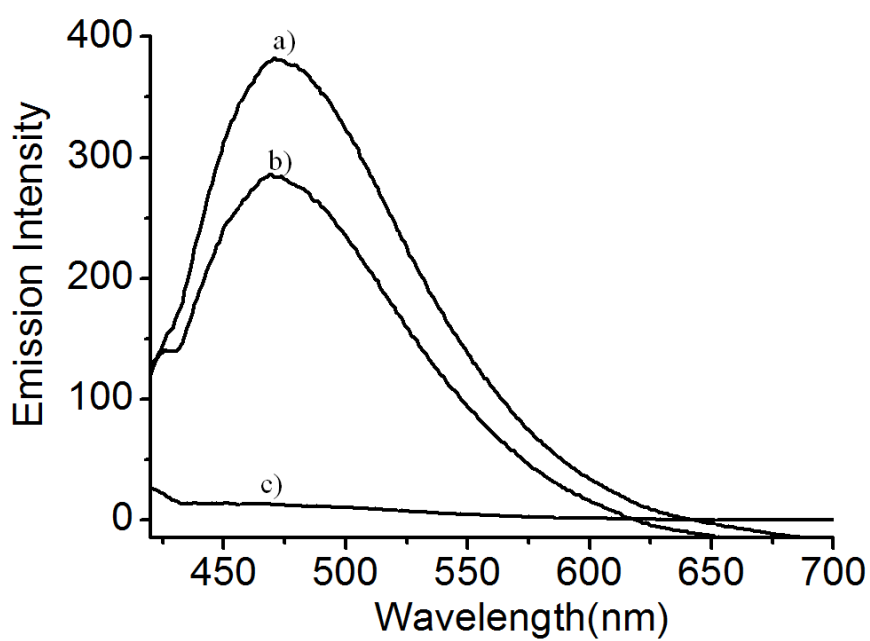

**Fig. S7** Fluorescence spectra of the coordination polymer gel **1** (20 mM,  $\lambda_{\text{ex}} = 410$  nm) with different metal ions (2.0 equiv); (a)  $\text{Zn}(\text{ClO}_4)_2$ , (b)  $\text{ZnCl}_2$ , and (c)  $\text{ZnI}_2$ .

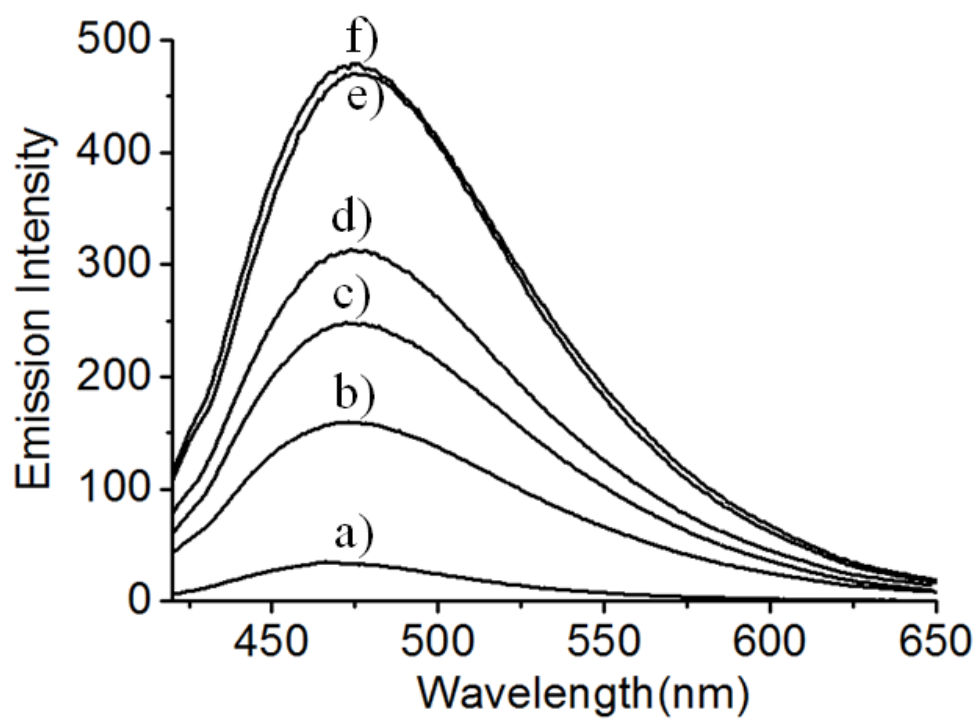

**Fig. S8** Emission spectra of gel **1** (20 mM) with different equivalents of Zn(ClO<sub>4</sub>)<sub>2</sub>. ( $\lambda_{\text{ex}}=410$  nm); (a) 0.0, (b) 0.3, (c) 0.45, (d) 0.6, (e) 1.0, and (f) 2.0 equivalents.

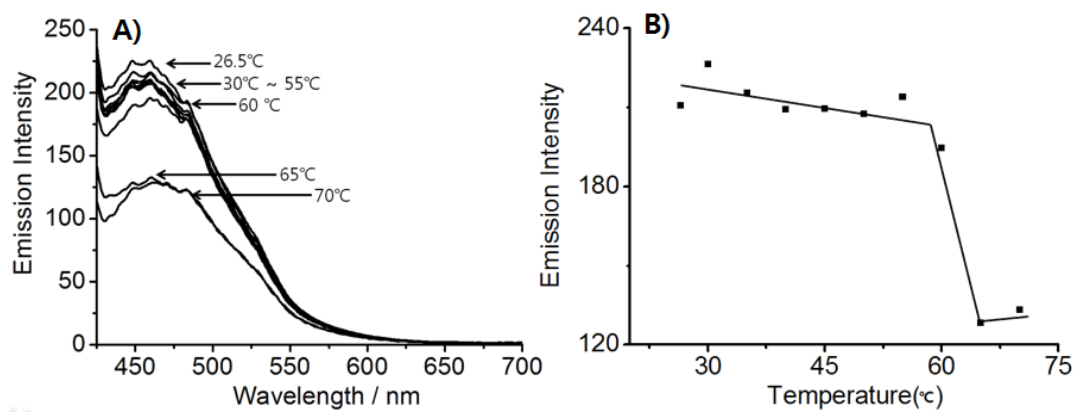

**Fig. S9** (A) Fluorescence spectra of gel **1** with Zn(ClO<sub>4</sub>)<sub>2</sub> at different temperatures upon excitation at λ=410 nm. (B) Plot of emission intensities of gel **1** at λ=475 nm against temperatures.

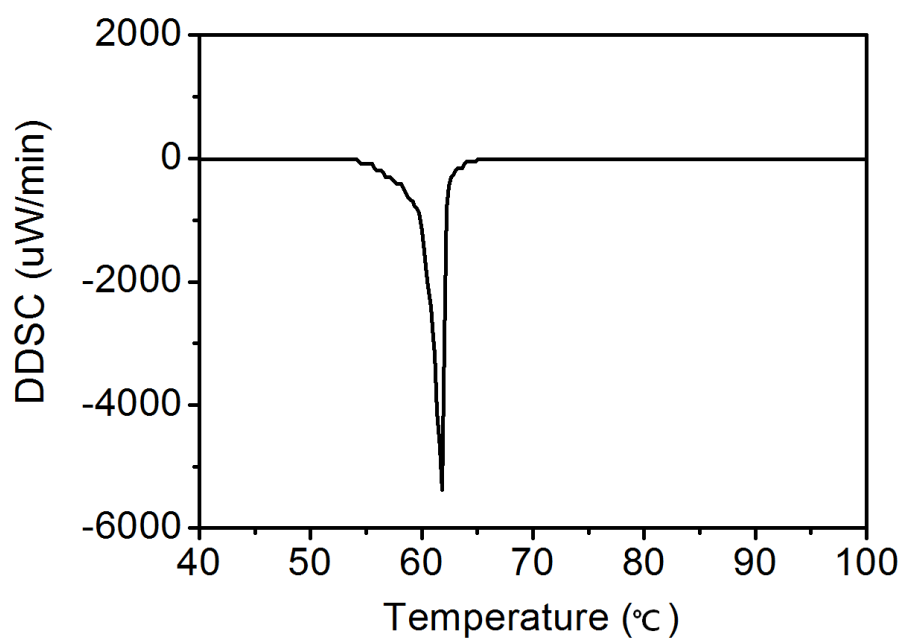

**Fig. S10** DSC thermogram of gel **1** with  $\text{Zn}^{2+}$  (2.0 equivalent).

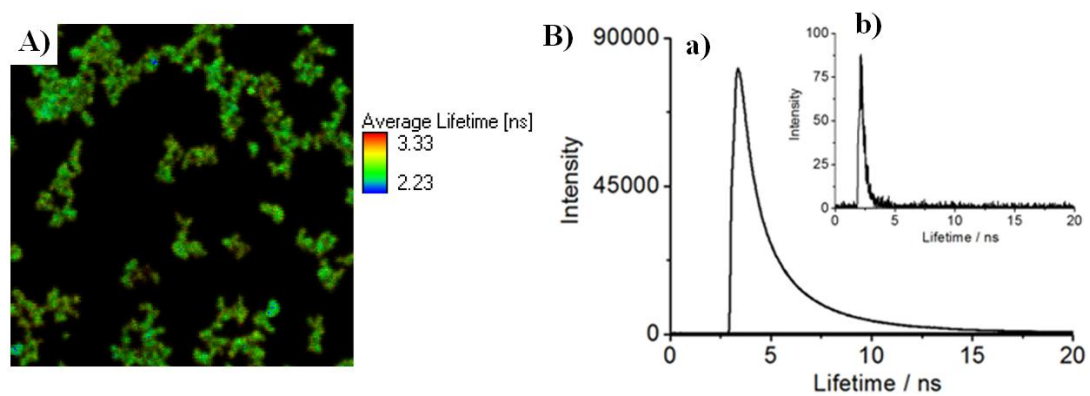

**Fig. S11** (A) Fluorescence image of gel **1** (3.0 wt%) with Zn(ClO<sub>4</sub>)<sub>2</sub> (2.0 equivalent) by fluorescence lifetime microscopy. (B) Fluorescence decay profiles of (a) gel **1** (3.0 wt%) and (b) sol **1**.

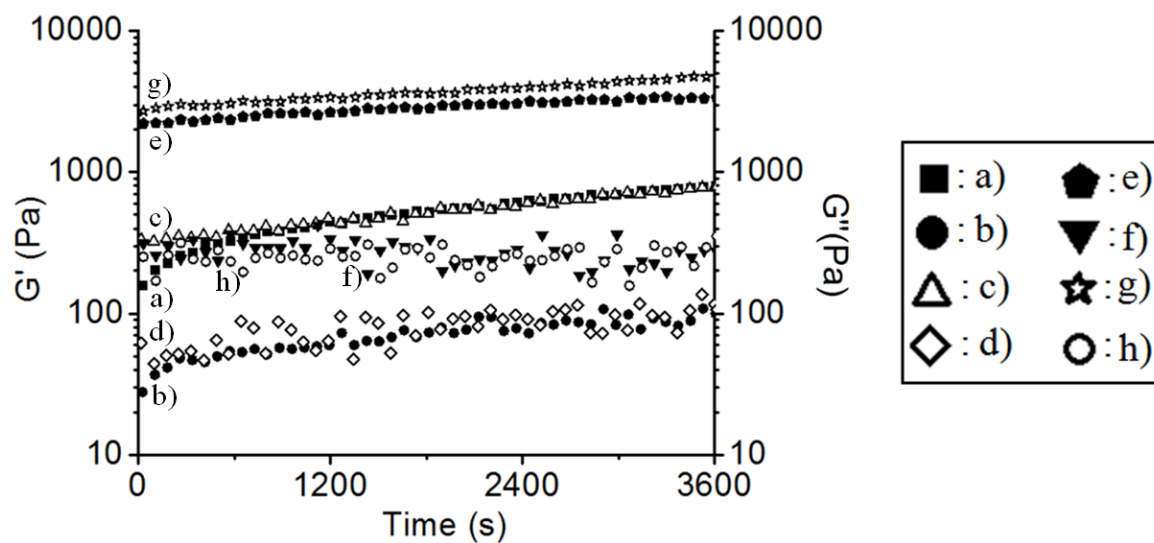

**Fig. S12** Dynamic oscillatory and steady shear measurements of coordination polymer gel **1** at different concentration of  $\text{Zn}^{2+}$  at 25 °C: time sweep at a strain of 0.01% and frequency of 1 rad s<sup>-1</sup>; 1: $\text{Zn}(\text{ClO}_4)_2$ =1:0.3 ■:  $G'$ , ●:  $G''$ ; 1: $\text{Zn}(\text{ClO}_4)_2$ =1:0.6 △:  $G'$ , ◇:  $G''$ ; 1: $\text{Zn}(\text{ClO}_4)_2$ =1:1  $G'$ : ●, ▼:  $G''$ ; 1: $\text{Zn}(\text{ClO}_4)_2$ =1:2 ☆:  $G'$ , ○:  $G''$ .
